# Supplementary material
Source: publisher site journal article supplement (https://www.dovepress.com/article/423860)
Supplement: Supplementary file 1 [file get_supplementary_file.php]

**Table S1**

**Table S2**

**Table S1** Primer sequences of genotyping of UPEC

| Analysis Marker Direction Sequence (5’一3’) Product length (bp) | | | | |
| --- | --- | --- | --- | --- |
| MLST**a,b** | *adk* | Forward  Reverse | ATTCTGCTTGGCGCTCCGGG  CCGTCAACTTTCGCGTATTT | 583 |
|  | *fumC* | Forward  Reverse | TCACAGGTCGCCAGCGCTTO  GTACGCAGCGAAAAAGATTC | 806 |
|  | *gyrB* | Forward  Reverse | TCGGCGACACGGATGACGGC  ATCAGGCCTTCACGCGCATC | 911 |
|  | *icd* | Forward  Reverse | ATGGAAAGTAAAGTAGTTGTTCCGGCACA  GGACGCAGCAGGATCTGTT | 878 |
|  | *mdh* | Forward  Reverse | ATGAAAGTCGCAGTCCTCGGCGCTGCTGGCGG  TTAACGAACTCCTGCCCCAGAGCGATATCTTTCTT | 932 |
|  | *purA* | Forward  Reverse | CGCGCTGATGAAAGAGATGA  CATACGGTAAGCCACGCAGA | 816 |
|  | *recA* | Forward  Reverse | CGCATTCGCTTTACCCTGACC  TCGTCGAAATCTACGGACCGGA | 780 |
| phylogenetic grouping**c** | *gadA* | Forward  Reverse | GATGAAATGGCGTTGGCGCAAG  GGCGGAAGTCCCAGACGATATCC | 373 |
|  | *chuA* | Forward  Reverse | ATGATCATCGCGGCGTGCTG  AAACGCGCTCGCGCCTAAT | 281 |
|  | *yiaA* | Forward  Reverse | TGTTCGCGATCTTGAAAGCAAACGT  ACCTGTGACAAACCGCCCTCA | 216 |
|  | *TSPE4.C2* | Forward  Reverse | GCGGGTGAGACAGAAACGCG  TTGTCGTGAGTTGCGAACCCG | 152 |

**a** MLST, multilocus sequence typing

**b**the primers taken from the refference: Tartof SY, Solberg OD, Manges AR, Riley LW. Analysis of a uropathogenic Escherichia coli clonal group by multilocus sequence typing. J Clin Microbiol 2005;43:5860-4

**c** the primers taken from the refference: Yun KW, Kim DS, Kim W, Lim IS. Molecular typing of uropathogenic Escherichia coli isolated from Korean children with urinary tract infection. Korean J Pediatr. 2015 Jan;58(1):20-7. doi: 10.3345/kjp.2015.58.1.20. Epub 2015 Jan 31. PMID: 25729395; PMCID: PMC4342777.

**Table S2.** Primers sequence of nineteen virulence genes

| Gene Sequence (5’-3’) Size Product (bp) Reference | | | | |
| --- | --- | --- | --- | --- |
| *traT* | F: TGGTATAGTTCACATCTTCC  R: TAAAGCCTACTACTGGATTC | 233 |  |
| *kpsM* | F: CCAGAGTAGATATGACCAG  R: CTACGAGAAATACGAACAC | 409 |  |
| *iutA* | F: GTTCACGCTCTTTGTCAGG  R: GGGCTTAATCTCGGGAAAGG | 801 |  |
| *sat* | F: GTTGGCAAACAGGTCAAAC  R: CTCGGAGTATTGGCTTCAG | 809 | (Ballesteros-Monrreal et al., 2021) | |
| *fimH* | F: TTATGGCGGCGTGTTATC  R: TCCCTACTGCTCCTAACG | 545 |
| *papC* | F: TTCTCTCTCCCTCAATACGG  R: TTATAACCTCAACGGGACGG | 926 |
| *papG-II* | F: ATTCACCATAGAGGCGACTG  R: ATCATTATGCGGCTCAGAC | 237 |
| *feoB* | F: GTCTAACCTTGAGCGTAACC  R: GGCGAGGAAGATAGTCAGC | 736 |
| *fliCD* | F: CCGAATCAGAGTTAGTTCCG  R: CCCAGCGATGAAATACTTGC | 610 |
| *chuA* | F: ATGATCATCGCGGCGTGCTG  R: AAACGCGCTCGCGCCTAAT | 281 | (Tartof et al., 2005) | |
| *yfcV* | F: ACATGGAGACCACGTTCACC  R: GTAATCTGGAATGTGGTCAGG | 292 | (Spurbeck et al., 2012) | |
| *fyuA* | F: GTAAACAATCTTCCCGCTCGGCAT  R: TGACGATTAACGAACCGGAAGGGA | 850 |
| *OmpT* | F: ATCTAGCCGAAGAAGGAGGC  R: CCCGGGTCATAGTGTTCATC | 559 | (Johnson et al., 2015) | |
| *tsh* | F: CCGTACACAAATACGACGG  R: GGATGCCCCTGCAGCGT | 304 |
| *iroN* | F: AAGTCAAAGCAGGGGTTGCCCG  R: GACGCCGACATTAAGACGCAG | 665 | (Johnson et al., 2000) | |
| *vat* | F: TCAGGACACGTTCAGGCATTCAGT  R: GGCCAGAACATTTGCTCCCTTGTT | 1100 | (Vigil et al., 2011) | |
| *sfa* | F: CTCCGGAGAACTGGGTGCATCTTAC  R: CGGAGGAGTAATTACAAACCTGGCA | 410 | (Le Bouguenec et al., 1992) | |
| *hlyA* | F: AACAAGGATAAGCACTGTTCTGGCT  R: ACCATATAAGCGGTCATTCCCGTCA | 1177 | (Yamamoto et al., 1995) | |
| *cnf-1* | F: AAGATGGAGTTTCCTATGCAGGAG  R: CATTCAGAGTCCTGCCCTCATTATT | 498 |
